# Supplementary material
Source: PubMed Central journal article supplement (PMC4793451)

**Appendix 3: Risk of bias summary and graph: review authors' judgements about each risk of bias item for each included study [posted as supplied by author]**

|                      | Arm - 1 | Arm - 2        | Arm - 3        | Random sequence generation (selection bias) | Allocation concealment (selection bias) | Blinding of outcome assessment (detection bias) | Incomplete outcome data (attrition bias) | Selective reporting (reporting bias) | Other bias |
|----------------------|---------|----------------|----------------|---------------------------------------------|-----------------------------------------|-------------------------------------------------|------------------------------------------|--------------------------------------|------------|
| Aoki 2009            | Control | F              |                | ?                                           | ?                                       | ●                                               | ●                                        | ●                                    | ●          |
| Lin 2009             | Control | F              | S              | ●                                           | ●                                       | ●                                               | ●                                        | ●                                    | ?          |
| Milesky 2006         | S       | F              |                | ?                                           | ?                                       | ●                                               | ●                                        | ●                                    | ●          |
| Chaipinyo 2009       | S       | F              |                | ?                                           | ?                                       | ●                                               | ●                                        | ●                                    | ●          |
| Schilke 1996         | Control | S              |                | ●                                           | ?                                       | ●                                               | ●                                        | ?                                    | ?          |
| O'Reilly 1989        | Control | S              |                | ●                                           | ?                                       | ●                                               | ●                                        | ●                                    | ?          |
| Hopman-Rock 2000     | Control | S              |                | ?                                           | ?                                       | ●                                               | ●                                        | ●                                    | ?          |
| Baker 2001           | Control | S              |                | ●                                           | ?                                       | ●                                               | ●                                        | ●                                    | ?          |
| Gur 2002             | Control | S              |                | ?                                           | ?                                       | ?                                               | ●                                        | ●                                    | ?          |
| Topp 2002            | Control | S              |                | ?                                           | ?                                       | ●                                               | ●                                        | ●                                    | ?          |
| Huang 2003           | Control | S              |                | ?                                           | ●                                       | ●                                               | ●                                        | ●                                    | ?          |
| Quilty 2003          | Control | S              |                | ●                                           | ●                                       | ●                                               | ●                                        | ●                                    | ●          |
| Huang 2005           | Control | S              |                | ?                                           | ●                                       | ●                                               | ?                                        | ?                                    | ?          |
| Williamson 2007      | Control | S              |                | ●                                           | ●                                       | ●                                               | ●                                        | ●                                    | ●          |
| Bennell 2010         | Control | S              |                | ●                                           | ●                                       | ●                                               | ●                                        | ●                                    | ?          |
| Salli 2010           | Control | S              |                | ?                                           | ●                                       | ●                                               | ?                                        | ●                                    | ?          |
| Halbert 2001         | Control | A              |                | ?                                           | ?                                       | ●                                               | ●                                        | ?                                    | ?          |
| Talbot 2003          | Control | A              |                | ?                                           | ?                                       | ●                                               | ●                                        | ●                                    | ?          |
| Boujesson 1996       | Control | F+S            |                | ●                                           | ?                                       | ●                                               | ●                                        | ●                                    | ●          |
| Rogind 1998          | Control | F+S            |                | ●                                           | ?                                       | ●                                               | ●                                        | ●                                    | ?          |
| Hartman 2000         | Control | F+S            |                | ●                                           | ?                                       | ●                                               | ●                                        | ●                                    | ?          |
| Ravaud 2004          | Control | F+S            |                | ●                                           | ●                                       | ?                                               | ●                                        | ●                                    | ●          |
| Benavell 2005        | Control | F+S            |                | ●                                           | ●                                       | ●                                               | ●                                        | ●                                    | ●          |
| Briscoe 2007         | Control | F+S            |                | ●                                           | ?                                       | ●                                               | ●                                        | ●                                    | ?          |
| Lee 2009             | Control | F+S            |                | ●                                           | ●                                       | ●                                               | ●                                        | ●                                    | ●          |
| Wang 2009            | Control | F+S            |                | ●                                           | ●                                       | ●                                               | ●                                        | ●                                    | ●          |
| van Baar 2009        | Control | F+S            |                | ?                                           | ●                                       | ●                                               | ●                                        | ●                                    | ●          |
| Weig 2009            | Control | F+S            | S              | ●                                           | ●                                       | ●                                               | ●                                        | ●                                    | ?          |
| Silva 2008           | F+S     | Aquatic; F+S   |                | ●                                           | ?                                       | ●                                               | ●                                        | ●                                    | ?          |
| Yennan 2010          | F+S     | Aquatic; F+S   |                | ?                                           | ?                                       | ●                                               | ●                                        | ●                                    | ●          |
| Bauch 1997           | Control | F+A            |                | ?                                           | ?                                       | ●                                               | ●                                        | ●                                    | ●          |
| Thomas 2002          | Control | F+A            |                | ●                                           | ?                                       | ●                                               | ●                                        | ●                                    | ?          |
| Messier 2004         | Control | S+A            |                | ●                                           | ?                                       | ●                                               | ●                                        | ●                                    | ●          |
| Therstenson 2004     | Control | S+A            |                | ●                                           | ?                                       | ?                                               | ●                                        | ●                                    | ?          |
| Tak 2005             | Control | S+A            |                | ●                                           | ?                                       | ●                                               | ●                                        | ●                                    | ?          |
| Minor 1989           | F+S     | F+S+A          | Aquatic; F+S+A | ?                                           | ?                                       | ●                                               | ●                                        | ●                                    | ●          |
| McCarthy 2002        | F+S     | F+S+A          |                | ●                                           | ?                                       | ●                                               | ●                                        | ●                                    | ?          |
| Kovar 1992           | Control | F+S+A          |                | ●                                           | ?                                       | ●                                               | ●                                        | ●                                    | ?          |
| Etinger 1997         | Control | F+S+A          | S              | ●                                           | ?                                       | ●                                               | ?                                        | ●                                    | ?          |
| Peloquin 1999        | Control | F+S+A          |                | ●                                           | ?                                       | ●                                               | ●                                        | ●                                    | ?          |
| Dias 2003            | Control | F+S+A          |                | ●                                           | ?                                       | ●                                               | ●                                        | ●                                    | ?          |
| Keefe 2004           | Control | F+S+A          |                | ?                                           | ?                                       | ●                                               | ?                                        | ●                                    | ?          |
| Hay 2006             | Control | F+S+A          |                | ●                                           | ?                                       | ●                                               | ●                                        | ●                                    | ?          |
| Hughes 2006          | Control | F+S+A          |                | ●                                           | ?                                       | ●                                               | ●                                        | ●                                    | ?          |
| Fransen 2007         | Control | F+S+A          |                | ●                                           | ?                                       | ●                                               | ●                                        | ●                                    | ●          |
| Hurley 2007          | Control | F+S+A          |                | ●                                           | ●                                       | ●                                               | ●                                        | ●                                    | ?          |
| Aglanis 2008         | Control | F+S+A          |                | ●                                           | ●                                       | ●                                               | ●                                        | ●                                    | ●          |
| Farr 2010            | Control | F+S+A          |                | ●                                           | ●                                       | ?                                               | ●                                        | ●                                    | ●          |
| Lin 2010             | Control | F+S+A          | Aquatic; S+A   | ●                                           | ●                                       | ●                                               | ●                                        | ●                                    | ?          |
| Gill 2009            | F+S+A   | Aquatic; F+S+A |                | ●                                           | ●                                       | ●                                               | ?                                        | ●                                    | ?          |
| Fransen 2001         | Control | Aquatic; S     | F+S            | ●                                           | ●                                       | ●                                               | ●                                        | ●                                    | ?          |
| Foley 2003           | Control | Aquatic; S     | S              | ●                                           | ●                                       | ●                                               | ●                                        | ?                                    | ?          |
| Hinman 2007          | Control | Aquatic; S     |                | ●                                           | ●                                       | ●                                               | ●                                        | ●                                    | ?          |
| Patrick 2001         | Control | Aquatic; F+S   |                | ●                                           | ?                                       | ●                                               | ●                                        | ●                                    | ?          |
| Stener-Victorin 2004 | Control | Aquatic; F+S   |                | ?                                           | ●                                       | ●                                               | ●                                        | ●                                    | ?          |
| Wang 2011            | Control | Aquatic; F+A   | F+A            | ●                                           | ?                                       | ●                                               | ●                                        | ?                                    | ●          |
| Hale 2012            | Control | Aquatic; F+A   |                | ●                                           | ●                                       | ●                                               | ●                                        | ●                                    | ●          |
| Cochrane 2005        | Control | Aquatic; F+S+A |                | ●                                           | ●                                       | ●                                               | ●                                        | ●                                    | ●          |
| Wang 2007            | Control | Aquatic; F+S+A |                | ?                                           | ?                                       | ●                                               | ●                                        | ●                                    | ?          |
| Lund 2008            | Control | Aquatic; F+S+A | F+S+A          | ?                                           | ●                                       | ●                                               | ●                                        | ●                                    | ?          |

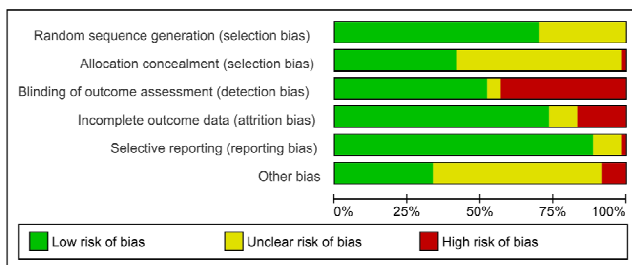

Supplement: utho011070.ww3_default.pdf [file utho011070.ww3_default.pdf]
