# Supplementary material
Source: PubMed Central journal article supplement (PMC4793451)

## **Appendix 5: Network of eligible comparisons and contribution of each comparison in the network meta-analysis for pain relief**

A) The size of every node is proportional to the number of randomised participants (sample size) and the width of the line is proportional to the number of trials comparing every pair of exercise interventions. B) Percentage contribution of each pairwise comparison of exercise intervention in the network, calculated using weighted squares representing the percentage contribution of each comparison. The size of the diamond is proportional to the percentage contribution to mixed, indirect and entire treatment effect estimates in the network. The network of eligible comparisons and their contributions is similar for the analysis of physical function. [posted as supplied by author]

### A) Network of evidence

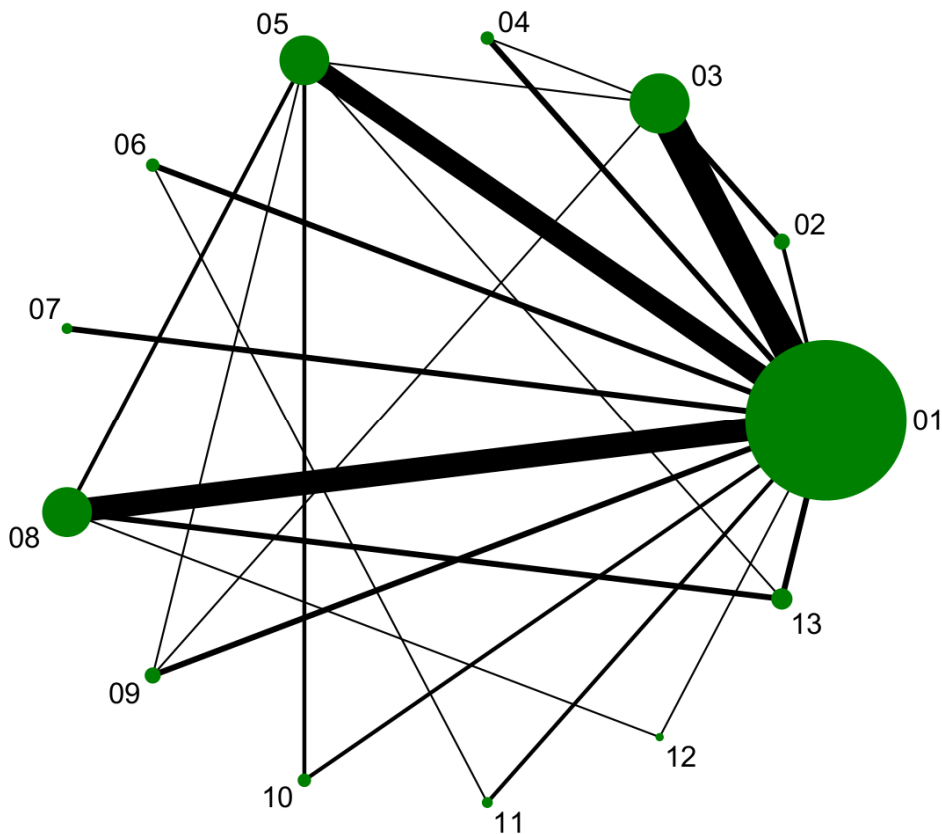

Number of patients

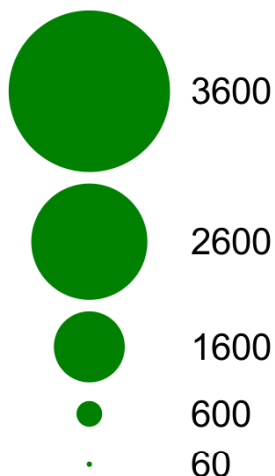

Number of comparisons

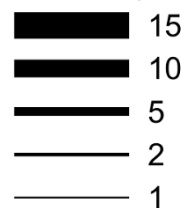

Type of exercise

- 1: No intervention control
- 2: Flexibility (F)
- 3: Strengthening (S)
- 4: Aerobic (A)
- 5: Flexibility + Strengthening
- 6: Flexibility + Aerobic
- 7: Strengthening + Aerobic
- 8: Combined (F+S+A)
- 9: Aquatic: Strengthening
- 10: Aquatic: Flexibility + Strengthening
- 11: Aquatic: Flexibility + Aerobic
- 12: Aquatic: Strengthening + Aerobic
- 13: Aquatic: Combined (F+S+A)

### B) Contribution of each comparison in network

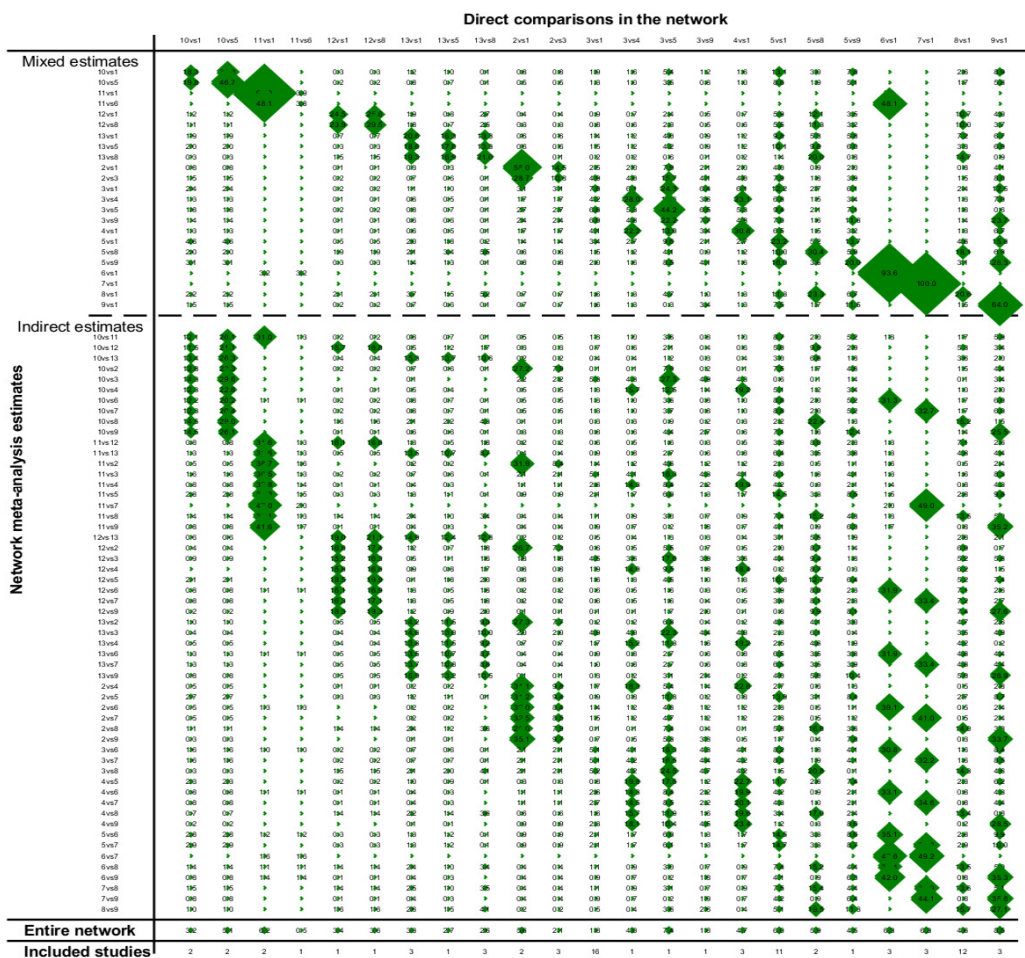

Supplement: utho011070.ww5_default.pdf [file utho011070.ww5_default.pdf]
