# Supplementary material
Source: PubMed Central journal article supplement (PMC4793451)
Supplement: utho011070.ww6_default.pdf [file utho011070.ww6_default.pdf]

Appendix 6: Pain and physical function treatment effect estimates of all comparisons according to network meta-analysis. F: Flexibility, S: Strengthening, A: Aerobic, CrI - credible intervals. Note: Significant results are in bold and underlined

|                                         |                          |                          |                          |                          |                          |                          |                                         |                          |                          |                          |                          |                          |
|-----------------------------------------|--------------------------|--------------------------|--------------------------|--------------------------|--------------------------|--------------------------|-----------------------------------------|--------------------------|--------------------------|--------------------------|--------------------------|--------------------------|
| <b>No intervention</b>                  | -0.17<br>(-1.26 to 0.93) | -0.37<br>(-0.84 to 0.09) | -0.30<br>(-1.53 to 0.92) | -0.40<br>(-0.92 to 0.12) | -0.18<br>(-1.24 to 0.89) | -0.17<br>(-1.25 to 0.91) | <b>-0.63</b><br><b>(-1.16 to -0.10)</b> | -0.43<br>(-1.42 to 0.56) | -0.61<br>(-1.75 to 0.52) | 0.07<br>(-1.23 to 1.36)  | -0.86<br>(-2.52 to 0.79) | -0.49<br>(-1.32 to 0.33) |
| <b>-0.66</b><br><b>(-1.33 to -0.00)</b> | <b>F</b>                 | -0.20<br>(-1.24 to 0.83) | -0.13<br>(-1.74 to 1.48) | -0.23<br>(-1.44 to 0.97) | -0.01<br>(-1.54 to 1.52) | 0.00<br>(-1.53 to 1.54)  | -0.46<br>(-1.67 to 0.75)                | -0.26<br>(-1.72 to 1.19) | -0.44<br>(-2.01 to 1.13) | 0.24<br>(-1.45 to 1.93)  | -0.69<br>(-2.69 to 1.29) | -0.32<br>(-1.69 to 1.05) |
| <b>-0.81</b><br><b>(-1.13 to -0.50)</b> | -0.15<br>(-0.79 to 0.49) | <b>S</b>                 | 0.07<br>(-1.19 to 1.32)  | -0.03<br>(-0.71 to 0.65) | 0.20<br>(-0.96 to 1.36)  | 0.21<br>(-0.97 to 1.38)  | -0.26<br>(-0.95 to 0.44)                | -0.06<br>(-1.12 to 1.00) | -0.24<br>(-1.45 to 0.97) | 0.44<br>(-0.93 to 1.81)  | -0.49<br>(-2.21 to 1.23) | -0.12<br>(-1.06 to 0.82) |
| -0.41<br>(-1.13 to 0.30)                | 0.25<br>(-0.70 to 1.21)  | 0.40<br>(-0.35 to 1.15)  | <b>A</b>                 | -0.10<br>(-1.42 to 1.23) | 0.13<br>(-1.49 to 1.75)  | 0.14<br>(-1.50 to 1.76)  | -0.33<br>(-1.65 to 1.01)                | -0.13<br>(-1.69 to 1.44) | -0.31<br>(-1.97 to 1.36) | 0.37<br>(-1.40 to 2.14)  | -0.56<br>(-2.62 to 1.50) | -0.19<br>(-1.66 to 1.28) |
| <b>-0.50</b><br><b>(-0.85 to -0.16)</b> | 0.16<br>(-0.58 to 0.91)  | 0.31<br>(-0.14 to 0.76)  | -0.09<br>(-0.88 to 0.70) | <b>F+S</b>               | 0.23<br>(-0.95 to 1.41)  | 0.24<br>(-0.96 to 1.44)  | -0.23<br>(-0.91 to 0.46)                | -0.03<br>(-1.09 to 1.04) | -0.21<br>(-1.31 to 0.88) | 0.47<br>(-0.93 to 1.87)  | -0.46<br>(-2.19 to 1.26) | -0.09<br>(-1.01 to 0.83) |
| -0.26<br>(-1.00 to 0.47)                | 0.40<br>(-0.59 to 1.39)  | 0.55<br>(-0.25 to 1.35)  | 0.15<br>(-0.87 to 1.18)  | 0.24<br>(-0.58 to 1.05)  | <b>F+A</b>               | 0.01<br>(-1.50 to 1.53)  | -0.45<br>(-1.65 to 0.74)                | -0.25<br>(-1.71 to 1.21) | -0.44<br>(-1.98 to 1.12) | 0.25<br>(-1.22 to 1.70)  | -0.69<br>(-2.65 to 1.29) | -0.31<br>(-1.67 to 1.04) |
| -0.13<br>(-0.88 to 0.61)                | 0.53<br>(-0.47 to 1.53)  | 0.68<br>(-0.13 to 1.49)  | 0.28<br>(-0.76 to 1.31)  | 0.37<br>(-0.46 to 1.19)  | 0.13<br>(-0.92 to 1.18)  | <b>S+A</b>               | -0.46<br>(-1.67 to 0.74)                | -0.26<br>(-1.73 to 1.19) | -0.45<br>(-2.01 to 1.12) | 0.24<br>(-1.45 to 1.92)  | -0.70<br>(-2.68 to 1.28) | -0.32<br>(-1.68 to 1.03) |
| <b>-0.69</b><br><b>(-1.04 to -0.35)</b> | -0.03<br>(-0.78 to 0.72) | 0.12<br>(-0.34 to 0.58)  | -0.28<br>(-1.07 to 0.50) | -0.19<br>(-0.64 to 0.26) | -0.43<br>(-1.25 to 0.38) | -0.56<br>(-1.38 to 0.26) | <b>F+S+A</b>                            | 0.20<br>(-0.92 to 1.32)  | 0.02<br>(-1.21 to 1.25)  | 0.70<br>(-0.70 to 2.09)  | -0.23<br>(-1.90 to 1.42) | 0.14<br>(-0.71 to 0.99)  |
| -0.75<br>(-1.42 to -0.07)               | -0.08<br>(-1.02 to 0.85) | 0.07<br>(-0.65 to 0.79)  | -0.34<br>(-1.32 to 0.64) | -0.24<br>(-0.97 to 0.49) | -0.48<br>(-1.49 to 0.52) | -0.61<br>(-1.62 to 0.40) | -0.05<br>(-0.81 to 0.71)                | <b>Aquatic: S</b>        | -0.18<br>(-1.66 to 1.30) | 0.50<br>(-1.12 to 2.13)  | -0.43<br>(-2.37 to 1.49) | -0.06<br>(-1.34 to 1.22) |
| <b>-0.96</b><br><b>(-1.64 to -0.27)</b> | -0.29<br>(-1.25 to 0.66) | -0.14<br>(-0.90 to 0.61) | -0.54<br>(-1.53 to 0.44) | -0.45<br>(-1.14 to 0.23) | -0.69<br>(-1.70 to 0.31) | -0.82<br>(-1.84 to 0.20) | -0.26<br>(-1.02 to 0.50)                | -0.21<br>(-1.16 to 0.74) | <b>Aquatic: F+S</b>      | 0.68<br>(-1.03 to 2.39)  | -0.25<br>(-2.26 to 1.76) | 0.12<br>(-1.25 to 1.50)  |
| -0.07<br>(-0.98 to 0.83)                | 0.59<br>(-0.54 to 1.71)  | 0.74<br>(-0.22 to 1.70)  | 0.34<br>(-0.82 to 1.49)  | 0.43<br>(-0.54 to 1.40)  | 0.19<br>(-0.83 to 1.21)  | 0.06<br>(-1.12 to 1.23)  | 0.62<br>(-0.36 to 1.59)                 | 0.67<br>(-0.46 to 1.81)  | 0.88<br>(-0.26 to 2.02)  | <b>Aquatic: F+A</b>      | -0.93<br>(-3.04 to 1.16) | -0.56<br>(-2.09 to 0.97) |
| -0.92<br>(-2.08 to 0.25)                | -0.26<br>(-1.60 to 1.09) | -0.11<br>(-1.31 to 1.10) | -0.51<br>(-1.87 to 0.85) | -0.42<br>(-1.62 to 0.79) | -0.66<br>(-2.02 to 0.72) | -0.78<br>(-2.16 to 0.60) | -0.22<br>(-1.38 to 0.93)                | -0.17<br>(-1.52 to 1.17) | 0.04<br>(-1.31 to 1.38)  | -0.84<br>(-2.32 to 0.63) | <b>Aquatic: S+A</b>      | 0.37<br>(-1.44 to 2.20)  |
| -0.45<br>(-1.02 to 0.11)                | 0.21<br>(-0.66 to 1.08)  | 0.36<br>(-0.29 to 1.01)  | -0.04<br>(-0.95 to 0.87) | 0.05<br>(-0.58 to 0.68)  | -0.19<br>(-1.12 to 0.74) | -0.32<br>(-1.26 to 0.62) | 0.24<br>(-0.34 to 0.83)                 | 0.29<br>(-0.59 to 1.17)  | 0.50<br>(-0.37 to 1.38)  | -0.38<br>(-1.45 to 0.69) | 0.47<br>(-0.80 to 1.74)  | <b>Aquatic: F+S+A</b>    |

| Pain (SMD, 95 CrI) | Comparison | Physical function (SMD, 95 CrI) |
|--------------------|------------|---------------------------------|
|--------------------|------------|---------------------------------|
